# Supplementary material
Source: HighWire-hosted journal article supplement (http://www.qdcxjkg.com/highwire/filestream/113213/field_highwire_adjunct_files/0/Supplementary_material.pdf)
Supplement: Supplementary_material.pdf [file Supplementary_material.pdf]

|                                                                        |                                                                                                |
|------------------------------------------------------------------------|------------------------------------------------------------------------------------------------|
| Reason For Antibiotic according to ERS-ESCMID guideline recommendation | Guideline populations for antibiotic treatment                                                 |
|                                                                        | Data available in case report form (CRF) or diary in the GRACE study                           |
| Suspected or definite pneumonia                                        | Must have <b>Acute Cough</b> and one of:                                                       |
|                                                                        | Cough - present on the day of inclusion                                                        |
|                                                                        | <b>1. New Focal Chest Sign</b>                                                                 |
|                                                                        | Diminished Vesicular Breathing - present on the day of inclusion                               |
|                                                                        | Crackles - present on the day of inclusion                                                     |
|                                                                        | Rhonchi - present on the day of inclusion                                                      |
|                                                                        | <b>2. Dyspnoea</b>                                                                             |
|                                                                        | Shortness of breath - present on the day of inclusion                                          |
|                                                                        | <b>3. Tachypnoea</b>                                                                           |
|                                                                        | Respiratory rate (breaths per minute) - more than 20 per minute                                |
|                                                                        | <b>4. Fever Lasting 4 days</b>                                                                 |
|                                                                        | How many days were you unwell before you saw your GP or nurse for this cough? - minimum 4 days |
| Temperature recorded using a disposable thermometer - more than 37.8°C |                                                                                                |
| Selected exacerbations of COPD                                         | Must have <b>Chronic Obstructive Pulmonary Disease (COPD)</b> and all of:                      |
|                                                                        | COPD - present on the day of inclusion                                                         |
|                                                                        | <b>1. Increased dyspnoea</b>                                                                   |
|                                                                        | Shortness of breath - present on the day of inclusion                                          |
|                                                                        | <b>2. Increased sputum volume</b>                                                              |
|                                                                        | Phlegm production - present on the day of inclusion                                            |
|                                                                        | <b>3. Increased sputum purulence</b>                                                           |
|                                                                        | If producing phlegm, what colour? - Colour is yellow, green or bloodstained                    |
| <b>Or Severe COPD</b>                                                  |                                                                                                |
| Pulse Oximetry (% saturation) - less than 90%                          |                                                                                                |
| Aged 75 yrs and fever                                                  | Must have <b>Aged over 75 years</b>                                                            |
|                                                                        | Age - over 75 years                                                                            |
|                                                                        | <b>and Fever</b>                                                                               |
|                                                                        | Temperature recorded using a disposable thermometer - more than 37.8°C                         |
| Cardiac Failure                                                        | <b>Cardiac Failure</b>                                                                         |

|                                     |                                                 |
|-------------------------------------|-------------------------------------------------|
|                                     | Heart Failure - present on the day of inclusion |
| Insulin-dependent diabetes mellitus | <i>Insulin-dependent diabetes mellitus</i>      |
|                                     | Diabetes - present on the day of inclusion      |
|                                     | Insulin - present on the day of inclusion       |
| Serious Neurological Disorder       | <i>Serious Neurological Disorder</i>            |
|                                     | n/a                                             |

**Table 1 online - Comparison of the ERS-ESCMID guideline recommendations for antibiotic prescription for lower respiratory tract infections (LRTI) and corresponding information collected in the GRACE\* study**

\* Genomics to combat Resistance against Antibiotics in Community-acquired LRTI in Europe ([www.grace-lrti.org](http://www.grace-lrti.org))
